# Supplementary material for: In Vitro Biological Activity and Lymphoma Cell Growth Inhibition by Selected Mexican Medicinal Plants
Source: MDPI journal article supplement (doi:10.3390/life13040958), 2023-04-06
Supplement: s1 [file s1]

---

## Supplementary Material

### Phytochemical Screening Tests

#### S1. Alkaloids (Dragendorff Test)

An amount of 1 mg of the extract was dissolved in 2 mL of methanol, and four drops of Dragendorff reagent were added; the test was considered positive if a persistent red-orange coloration was present. To prepare the reagent, two solutions were used: Solution A, which contained 0.85 g of  $\text{Bi}(\text{NO}_3)_3$ , which was mixed with 10 mL of  $\text{CH}_3\text{COOH}$  and 40 mL of water, and Solution B, which contained 8 g of KI dissolved in 20 mL of water. The reagent was prepared by mixing 5 mL of A, 4 mL of B, and 100 mL of water.

#### S2. Carbohydrates (Molish Test)

Molish's reagent (1% alpha-naphthol in ethanol) was added dropwise to 1 mg of the extracts, and then 2 mL of  $\text{H}_2\text{SO}_4$  was added through the walls of the test tube. The test was considered positive when a purple-colored ring formed at the interface.

#### S3. Coumarin Test

An amount of 2 mg of the extracts was dissolved in 2 mL of methanol, and 10% NaOH was added dropwise. The test was considered positive if a yellow coloration was present and if it disappeared when the solution was acidified.

#### S4. Instaurations ( $\text{KMnO}_4$ Test)

1 mg of the extracts was dissolved in 2 mL of methanol, and four drops of 2%  $\text{KMnO}_4$  in water were added. The test was considered positive when discoloration or formation of a brown precipitate was observed, a result of the formation of  $\text{MnO}_2$ .

#### S5. Flavonoids ( $\text{H}_2\text{SO}_4$ Test)

An amount of 1 mg of the extract was dissolved in 2 mL of  $\text{H}_2\text{SO}_4$ , and a positive result was indicated by yellow coloration for flavonoids, orange-cherry for flavones, red bluish for chalcones, and red-purple for quinones.

#### S6. Quinones (NaOH Test)

5 - 10 mg of the sample, 0.2 mL of ethanol, and 0.4 mL of a 5 % aqueous sodium hydroxide solution are introduced into a test tube. It is observed if there is color formation, and its ultraviolet spectrum is registered.

#### S7. Saponins ( $\text{NaHCO}_3$ Test)

The aqueous solution of 10%  $\text{NaHCO}_3$  was prepared, and then 2 mg of the extracts were dissolved in 2 mL of methanol, and four drops of concentrated  $\text{H}_2\text{SO}_4$  were added. It was stirred slightly, and four drops of the  $\text{NaHCO}_3$  solution were added. The appearance of bubbles and their permanence for more than 1 min indicated the presence of saponins.

---

#### **S8. Sesquiterpene-Lactones (Baljet Test)**

An amount of 2 mg of the extracts was dissolved in 2 mL of ethanol, and three drops of the mixed solution were added, with a positive result being indicated if it turned from orange to dark red. The 1:1 mixed solution consisted of Solution A, which contained 1%  $\text{C}_6\text{H}_3\text{N}_3\text{O}_7$  in ethanol, and Solution B, which contained 10% NaOH.

#### **S9. Sterols and Terpenes (Salkowski Test)**

An amount of 1 mg of each extract was dissolved in 2 mL of chloroform, and subsequently, 2 mL of  $\text{H}_2\text{SO}_4$  was added. A positive reaction was considered for sterols and methyl sterols when a red-brown ring was formed at the interface.

#### **S10. Phenolic Compounds (Tannins) ( $\text{FeCl}_3$ Test)**

1 mg of the extracts was dissolved in 2 mL of methanol, and then four drops of 2.5%  $\text{FeCl}_3$  in water were added. The appearance of a red, blue-violet, or green precipitate was considered positive.
